# Supplementary material for: Gibberellin A1 Metabolism Contributes to the Control of Photoperiod-Mediated Tuberization in Potato
Source: PLoS One. 2011 Sep 22;6(9):e24458. doi: 10.1371/journal.pone.0024458 (PMC3178525; doi:10.1371/journal.pone.0024458)
Supplement: Figure S2 — Structure of the StGA3ox2 clones and amino acid sequence comparison to other GA 3-oxidases. (PDF) [file pone.0024458.s003.pdf]

**Figure S2**

**A**

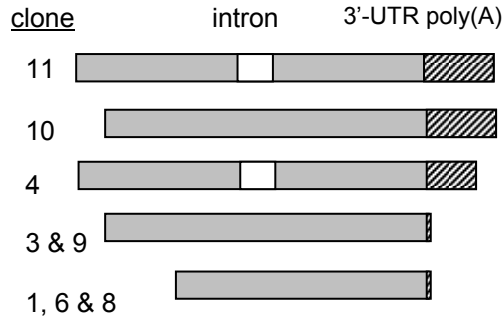

**B**

|        |     |      |        |       |        |        |      |      |        |      |       |       |       |      |      |      |       |      |      |      |      |      |      |     |      |    |   |   |
|--------|-----|------|--------|-------|--------|--------|------|------|--------|------|-------|-------|-------|------|------|------|-------|------|------|------|------|------|------|-----|------|----|---|---|
| At3ox1 | 1   | ---  | MPAMLT | TDVFR | GHPIH  | PHSHIP | FT   | SLR  | ELP    | DSYK | NTPKD | LLFSA | ASP   | -PAT | GEN  | PLID | LD    | ---- | HPD  | ATNQ |      |      |      |     |      |    |   |   |
| At3ox2 | 1   | ---  | MSSTL  | SDVFR | SRSHPI | HIPLSN | PP   | FK   | ---    | SLP  | DSYT  | WPKD  | LLFS  | AS   | ---  | ASD  | ET    | PLID | LD   | ---- | DIH  | VATL |      |     |      |    |   |   |
| Ls3h1  | 1   | ---  | MHTRV  | ADAFK | AHPMV  | NQKHL  | DLK  | SMK  | ELP    | ESHA | WLSQ  | -DG   | SPSYG | ---  | SSS  | EQ   | VPV   | INLK | ---- | DSN  | AMKL |      |      |     |      |    |   |   |
| Ls3h2  | 1   | ---  | MSLQ   | QLDAF | REKHL  | DLNSI  | KELP | ESHA | WLSQ   | -DNC | P     | ---   | SSN   | SE   | VPV  | INLK | ----  | DSN  | AMKH |      |      |      |      |     |      |    |   |   |
| Le3ox1 | 1   | ---  | MPSRI  | SDSCR | PHHSOK | HFDL   | NSI  | KELP | ESHA   | WTSS | NDHYT | QEN   | ---   | SCN  | PES  | IP   | VIDL  | LDNN | NNNN | NNNN | NIL  | DH   |      |     |      |    |   |   |
| St3ox1 | 1   | ---  | MPTRIS | DSCR  | PHHSOK | HFDL   | NSI  | KELP | ESHA   | WTSS | NDHYT | QEN   | ---   | SCN  | PES  | IP   | VIDL  | LDNN | NNNN | NNNN | NIL  | DH   |      |     |      |    |   |   |
| Nty    | 1   | ---  | MPSRI  | SDSFR | -AHSOK | HFDL   | NSI  | KELP | ESHA   | WTSS | NDYPS | -EN   | ---   | SCN  | PES  | IP   | VIDL  | LDNY | NNNN | NNNN | NIL  | EH   |      |     |      |    |   |   |
| Le3ox2 | 1   | ---  | MPSII  | SSQDL | LYS    | IKELP  | ESHA | WTSS | DDGSRN | ---  | INAE  | SI    | PVIDL | ---  | INAE | SI   | PVIDL | ---  | HDH  | KFV  | MDT  |      |      |     |      |    |   |   |
| St3ox2 | 1   | ---  | MPSII  | SSQDL | LYS    | IKELP  | ESHA | WTSS | DDGSRN | ---  | INAE  | SI    | PVIDL | ---  | INAE | SI   | PVIDL | ---  | HDH  | KFV  | MDT  |      |      |     |      |    |   |   |
| Ps3ox1 | 1   | ---  | MPSLS  | EAYRA | HPVH   | VNHK   | HP   | FN   | SL     | CEL  | PES   | YNW   | HLDD  | HTL  | IDS  | NNI  | MKE   | STT  | TP   | VIDL | ---  | DP   | TAKL |     |      |    |   |   |
| Os3ox1 | 1   | MTSS | TS     | TS    | TS     | PLA    | AAH  | NGV  | TAA    | YF   | FR    | GA    | RV    | PES  | YWK  | GM   | HE    | KDT  | AP   | VAA  | AD   | GGDA | VPV  | DMS |      |    |   |   |
| Os3ox2 | 1   | ---  | MPT    | PSHL  | KNPL   | CF     | DF   | FR   | AAR    | RV   | PES   | YWK   | GM    | HE   | KDT  | AP   | VAA   | AD   | GGDA | VPV  | DMS  | ---  | AGD  | --- | AAAR |    |   |   |
| <hr/>  |     |      |        |       |        |        |      |      |        |      |       |       |       |      |      |      |       |      |      |      |      |      |      |     |      |    |   |   |
| At3ox1 | 71  | IGH  | ACT    | TG    | AG     | FQ     | I    | SNH  | G      | V    | P     | L     | G     | L    | L    | O    | D     | I    | E    | F    | L    | T    | G    | S   | L    | P  |   |   |
| At3ox2 | 64  | VGH  | ACT    | TG    | AG     | FQ     | I    | SNH  | G      | V    | P     | L     | G     | L    | L    | O    | D     | I    | E    | F    | L    | T    | G    | S   | L    | P  |   |   |
| Ls3h1  | 65  | VGH  | ACT    | TG    | AG     | FQ     | I    | SNH  | G      | V    | P     | L     | G     | L    | L    | O    | D     | I    | E    | F    | L    | T    | G    | S   | L    | P  |   |   |
| Ls3h2  | 57  | VGH  | ACT    | TG    | AG     | FQ     | I    | SNH  | G      | V    | P     | L     | G     | L    | L    | O    | D     | I    | E    | F    | L    | T    | G    | S   | L    | P  |   |   |
| Le3ox1 | 70  | IGH  | ACT    | TG    | AG     | FQ     | I    | SNH  | G      | V    | P     | L     | G     | L    | L    | O    | D     | I    | E    | F    | L    | T    | G    | S   | L    | P  |   |   |
| St3ox1 | 70  | IGH  | ACT    | TG    | AG     | FQ     | I    | SNH  | G      | V    | P     | L     | G     | L    | L    | O    | D     | I    | E    | F    | L    | T    | G    | S   | L    | P  |   |   |
| Nty    | 68  | IGH  | ACT    | TG    | AG     | FQ     | I    | SNH  | G      | V    | P     | L     | G     | L    | L    | O    | D     | I    | E    | F    | L    | T    | G    | S   | L    | P  |   |   |
| Le3ox2 | 56  | IGH  | ACT    | TG    | AG     | FQ     | I    | SNH  | G      | V    | P     | L     | G     | L    | L    | O    | D     | I    | E    | F    | L    | T    | G    | S   | L    | P  |   |   |
| St3ox2 | 56  | IGH  | ACT    | TG    | AG     | FQ     | I    | SNH  | G      | V    | P     | L     | G     | L    | L    | O    | D     | I    | E    | F    | L    | T    | G    | S   | L    | P  |   |   |
| Ps3ox1 | 70  | IGH  | ACT    | TG    | AG     | FQ     | I    | SNH  | G      | V    | P     | L     | G     | L    | L    | O    | D     | I    | E    | F    | L    | T    | G    | S   | L    | P  |   |   |
| Os3ox1 | 77  | VAR  | AE     | EE    | WG     | CE     | LL   | V    | GH     | CV   | TA    | EA    | AR    | BA   | QA   | AR   | EL    | LA   | DD   | KA   | GA   | RR   | GG   | GT  | CG   | VP |   |   |
| Os3ox2 | 61  | VAR  | AE     | EE    | WG     | CE     | LL   | V    | GH     | CV   | TA    | EA    | AR    | BA   | QA   | AR   | EL    | LA   | DD   | KA   | GA   | RR   | GG   | GT  | CG   | VP |   |   |
| <hr/>  |     |      |        |       |        |        |      |      |        |      |       |       |       |      |      |      |       |      |      |      |      |      |      |     |      |    |   |   |
| At3ox1 | 149 | LND  | FR     | K     | L      | W      | P    | ---  | Q      | H    | L     | N     | Y     | C    | L    | I    | V     | E    | Y    | E    | E    | H    | N    | K   | L    | A  | S |   |
| At3ox2 | 142 | LHD  | FR     | K     | L      | W      | P    | ---  | S      | H    | L     | N     | Y     | C    | L    | I    | V     | E    | Y    | E    | E    | H    | N    | K   | L    | A  | S |   |
| Ls3h1  | 143 | YEH  | A      | R     | K      | L      | W    | P    | ---    | N    | R     | M     | S     | R    | E    | C    | D     | V    | I    | E    | Y    | E    | E    | H   | N    | K  | L | A |
| Ls3h2  | 135 | HQH  | A      | R     | K      | L      | W    | P    | ---    | Q    | S     | G     | N     | F    | C    | D    | V     | I    | E    | Y    | E    | E    | H    | N   | K    | L  | A |   |
| Le3ox1 | 148 | LEH  | A      | R     | K      | L      | W    | P    | ---    | K    | D     | N     | K     | F    | C    | D    | V     | I    | E    | Y    | E    | E    | H    | N   | K    | L  | A |   |
| St3ox1 | 148 | LEH  | A      | R     | K      | L      | W    | P    | ---    | K    | D     | N     | K     | F    | C    | D    | V     | I    | E    | Y    | E    | E    | H    | N   | K    | L  | A |   |
| Nty    | 146 | LEH  | A      | R     | K      | L      | W    | P    | ---    | H    | O     | Y     | K     | F    | C    | D    | V     | I    | E    | Y    | E    | E    | H    | N   | K    | L  | A |   |
| Le3ox2 | 134 | LEH  | A      | R     | K      | L      | W    | P    | ---    | Y    | D     | N     | K     | F    | C    | D    | V     | I    | E    | Y    | E    | E    | H    | N   | K    | L  | A |   |
| St3ox2 | 134 | LEH  | A      | R     | K      | L      | W    | P    | ---    | Y    | D     | N     | K     | F    | C    | D    | V     | I    | E    | Y    | E    | E    | H    | N   | K    | L  | A |   |
| Ps3ox1 | 148 | LDE  | F      | R     | E      | L      | W    | P    | ---    | O    | D     | T     | R     | E    | C    | L    | V     | Q    | D    | E    | T    | M    | K    | L   | A    | S  | L |   |
| Os3ox1 | 157 | RDE  | F      | R     | E      | L      | W    | P    | ---    | D    | H     | R     | F     | C    | S    | A    | M     | E    | E    | D    | S    | S    | R    | A   | L    | E  | L |   |
| Os3ox2 | 140 | RSE  | L      | R     | L      | W      | P    | K    | S      | G    | D     | Y     | L     | F    | C    | D    | V     | I    | E    | Y    | E    | E    | H    | N   | K    | L  | A |   |
| <hr/>  |     |      |        |       |        |        |      |      |        |      |       |       |       |      |      |      |       |      |      |      |      |      |      |     |      |    |   |   |
| At3ox1 | 224 | DRAM | GLA    | A     | A      | H      | T    | S    | T      | L    | L     | T     | I     | L    | Y    | Q    | N     | N    | T    | A    | G    | L    | Q    | V   | R    | D  | D |   |
| At3ox2 | 217 | DRAM | GLA    | A     | A      | H      | T    | S    | T      | L    | L     | T     | I     | L    | Y    | Q    | N     | N    | T    | A    | G    | L    | Q    | V   | R    | D  | D |   |
| Ls3h1  | 214 | DRAM | GLA    | A     | A      | H      | T    | S    | T      | L    | L     | T     | I     | L    | Y    | Q    | N     | N    | T    | A    | G    | L    | Q    | V   | R    | D  | D |   |
| Ls3h2  | 210 | DRAM | GLA    | A     | A      | H      | T    | S    | T      | L    | L     | T     | I     | L    | Y    | Q    | N     | N    | T    | A    | G    | L    | Q    | V   | R    | D  | D |   |
| Le3ox1 | 224 | GRAM | GLA    | A     | A      | H      | T    | S    | T      | L    | L     | T     | I     | L    | Y    | Q    | N     | N    | T    | A    | G    | L    | Q    | V   | R    | D  | D |   |
| St3ox1 | 224 | GRAM | GLA    | A     | A      | H      | T    | S    | T      | L    | L     | T     | I     | L    | Y    | Q    | N     | N    | T    | A    | G    | L    | Q    | V   | R    | D  | D |   |
| Nty    | 222 | GRAM | GLA    | A     | A      | H      | T    | S    | T      | L    | L     | T     | I     | L    | Y    | Q    | N     | N    | T    | A    | G    | L    | Q    | V   | R    | D  | D |   |
| Le3ox2 | 206 | GRAM | GLA    | A     | A      | H      | T    | S    | T      | L    | L     | T     | I     | L    | Y    | Q    | N     | N    | T    | A    | G    | L    | Q    | V   | R    | D  | D |   |
| St3ox2 | 206 | GRAM | GLA    | A     | A      | H      | T    | S    | T      | L    | L     | T     | I     | L    | Y    | Q    | N     | N    | T    | A    | G    | L    | Q    | V   | R    | D  | D |   |
| Ps3ox1 | 223 | DRAM | GLA    | A     | A      | H      | T    | S    | T      | L    | L     | T     | I     | L    | Y    | Q    | N     | N    | T    | A    | G    | L    | Q    | V   | R    | D  | D |   |
| Os3ox1 | 237 | DRV  | GLA    | A     | A      | H      | T    | S    | T      | L    | L     | T     | I     | L    | Y    | Q    | N     | N    | T    | A    | G    | L    | Q    | V   | R    | D  | D |   |
| Os3ox2 | 219 | RRL  | GLA    | A     | A      | H      | T    | S    | T      | L    | L     | T     | I     | L    | Y    | Q    | N     | N    | T    | A    | G    | L    | Q    | V   | R    | D  | D |   |
| <hr/>  |     |      |        |       |        |        |      |      |        |      |       |       |       |      |      |      |       |      |      |      |      |      |      |     |      |    |   |   |
| At3ox1 | 303 | AYL  | MG     | P     | P      | S      | D    | I    | N      | I    | S     | P     | V     | P    | K    | L    | V     | S    | P    | V    | S    | E    | P    | L   | Y    | Q  | S |   |
| At3ox2 | 296 | AYL  | MG     | P     | P      | S      | D    | I    | N      | I    | S     | P     | V     | P    | K    | L    | V     | S    | P    | V    | S    | E    | P    | L   | Y    | Q  | S |   |
| Ls3h1  | 293 | AYL  | MG     | P     | P      | S      | D    | I    | N      | I    | S     | P     | V     | P    | K    | L    | V     | S    | P    | V    | S    | E    | P    | L   | Y    | Q  | S |   |
| Ls3h2  | 288 | AYL  | MG     | P     | P      | S      | D    | I    | N      | I    | S     | P     | V     | P    | K    | L    | V     | S    | P    | V    | S    | E    | P    | L   | Y    | Q  | S |   |
| Le3ox1 | 303 | AYL  | MG     | P     | P      | S      | D    | I    | N      | I    | S     | P     | V     | P    | K    | L    | V     | S    | P    | V    | S    | E    | P    | L   | Y    | Q  | S |   |
| St3ox1 | 303 | AYL  | MG     | P     | P      | S      | D    | I    | N      | I    | S     | P     | V     | P    | K    | L    | V     | S    | P    | V    | S    | E    | P    | L   | Y    | Q  | S |   |
| Nty    | 301 | AYL  | MG     | P     | P      | S      | D    | I    | N      | I    | S     | P     | V     | P    | K    | L    | V     | S    | P    | V    | S    | E    | P    | L   | Y    | Q  | S |   |
| Le3ox2 | 285 | AYL  | MG     | P     | P      | S      | D    | I    | N      | I    | S     | P     | V     | P    | K    | L    | V     | S    | P    | V    | S    | E    | P    | L   | Y    | Q  | S |   |
| St3ox2 | 285 | AYL  | MG     | P     | P      | S      | D    | I    | N      | I    | S     | P     | V     | P    | K    | L    | V     | S    | P    | V    | S    | E    | P    | L   | Y    | Q  | S |   |
| Ps3ox1 | 302 | AYL  | MG     | P     | P      | S      | D    | I    | N      | I    | S     | P     | V     | P    | K    | L    | V     | S    | P    | V    | S    | E    | P    | L   | Y    | Q  | S |   |
| Os3ox1 | 317 | PE   | FL     | GP    | P      | P      | AD   | M    | K      | V    | T     | PL    | VA    | AG   | S    | P    | E     | S    | K    | A    | Y    | Q    | V    | T   | W    | P  | E |   |
| Os3ox2 | 299 | GF   | FL     | GP    | P      | P      | DA   | EV   | AP     | L    | PE    | AV    | P     | AG   | S    | P    | E     | S    | K    | A    | Y    | Q    | V    | T   | W    | P  | E |   |

**Figure S2. Structure of StGA3ox2 clones isolated from potato. (A)** Schematic representation of the different clones corresponding to StGA3ox2 mRNA. An unspliced intron is present in clones 11 and 4. Multiple polyadenylation sites are used during transcription, with a poly-A tail added directly after the stop codon in clones 3 & 9, or clones 1, 6 & 8. **(B)** Comparison of potato StGA3ox1 and StGA3ox2 amino acid sequences with other GA 3-oxidases from Arabidopsis (At3ox1 NM 101424 and At3ox2 NM 106683), pea (Ps3ox1 AF010167), lettuce (Ls3h1 AB012205 and Ls3h2 AB012206), tomato (Le3ox1~S13ox1 AB010991 and Le3ox2~S13ox2 AB010992), tobacco (Nty AB032198) and rice (Os3ox1 AB054084 and Os3ox2 AB056519) genes. Black boxes indicate identical residues, and gray boxes indicate conserved residues. Dashes indicate gaps in the sequences. Sequence corresponding to the B3ox fragment is shown on top of the alignment with a thick black line.
