# Supplementary material for: Gibberellin A1 Metabolism Contributes to the Control of Photoperiod-Mediated Tuberization in Potato
Source: PubMed Central journal article supplement (PMC3178525; doi:10.1371/journal.pone.0024458), 2011-09-22
Supplement: pone.0024458.s002.pdf [file pone.0024458.s002.pdf]

## Figure S1

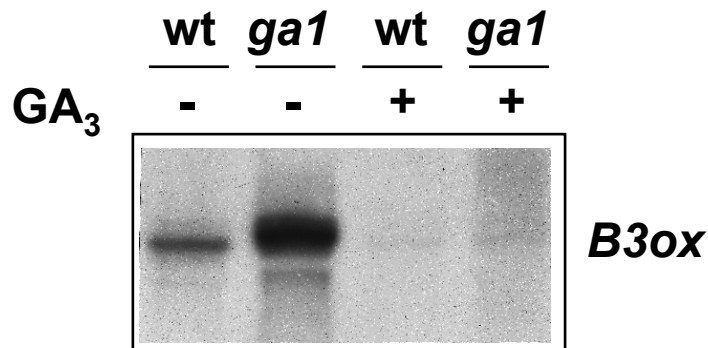

**Figure S1. Negative feed-back regulation of the corresponding mRNA hybridizing to PCR product *B3ox*.** Leaves and stems of 10-leaf plants were sprayed for 2 d with GA<sub>3</sub> or mock solutions. GA<sub>3</sub> was used at a final concentration of 50 μM. The *B3ox* (see Fig.2) corresponding transcript expression is increased in the *ga1* mutant. Reduction of its abundance by GA<sub>3</sub> application in both wild-type and *ga1* mutant plants confirms that the *B3ox* corresponding transcript is under negative feed-back regulation by GA<sub>3</sub>, behaving similarly as others *GA20ox* and *GA3ox*.
