# Supplementary material for: Gibberellin A1 Metabolism Contributes to the Control of Photoperiod-Mediated Tuberization in Potato
Source: PubMed Central journal article supplement (PMC3178525; doi:10.1371/journal.pone.0024458), 2011-09-22
Supplement: pone.0024458.s004.pdf [file pone.0024458.s004.pdf]

**Table S1**

**Statistical analysis on the tuberization time in transgenic lines over-expressing *StGA3ox2*.**

**A**

| Line \ Statistics        | 2-Way ANOVA*       | Survival Curve Logrank test** |
|--------------------------|--------------------|-------------------------------|
| Wt vs <i>35S:3ox2-10</i> | <b>P&lt;0.0001</b> | <b>P=0.11</b>                 |
| Wt vs <i>35S:3ox2-5</i>  | <b>P&lt;0.0001</b> | <b>P&lt;0.05</b>              |

**B**

| Line \ Statistics        | 2-Way ANOVA*       | Survival Curve Logrank test ** |
|--------------------------|--------------------|--------------------------------|
| Wt vs <i>LS1:3ox2-18</i> | <b>P=0.0001</b>    | <b>P&lt;0.05</b>               |
| Wt vs <i>LS1:3ox2-16</i> | <b>P&lt;0.0001</b> | <b>P&lt;0.0001</b>             |

**C**

| Line \ Statistics         | 2-Way ANOVA*     | Survival Curve Logrank test** |
|---------------------------|------------------|-------------------------------|
| Wt vs <i>Tub1:3ox2-30</i> | <b>P=0.50</b>    | <b>P&lt;0.01</b>              |
| Wt vs <i>Tub1:3ox2-37</i> | <b>P&lt;0.01</b> | <b>P=0.11</b>                 |
| Wt vs <i>Tub1:3ox2-3</i>  | <b>P=0.20</b>    | <b>P=0.052</b>                |

**Table S1.** Statistical analysis of tuberization time of wild type plants (Wt) vs different transgenic lines over-expressing *StGA3ox2*: constitutive *35S:3ox2* lines (**A**), leaf specific *LS1:3ox2* lines (**B**), and tuber specific *Tub1:3ox2* lines (**C**). \*The ratio of individuals with tubers was weekly scored from three different experiments, and a two way ANOVA Pvalue for interaction between genotype and tuberization time is given. \*\*The number of individuals with tubers vs time was plotted as a Survival Curve from one typical experiment, and the Logrank test generated a Pvalue testing the null hypothesis that the survival curves are identical. These statistical analysis were performed using the GraphPad Prism software package.
